# Supplementary material for: Methodologies for the analysis of pesticides and pharmaceuticals in sediments and plant tissue
Source: Royal Society of Chemistry journal article supplement (doi:10.1039/c8ay00393a), 2018-01-01
Supplement: c8ay00393a1.pdf [file c8ay00393a1.pdf]

## Supplementary Information for

# Methodologies for the analysis of pesticides and pharmaceuticals in sediments and plant tissue

Pedro N. Carvalho<sup>1†</sup>, Yang Zhang<sup>1,2‡</sup>, Tao Lyu<sup>1§</sup>, Carlos A. Arias<sup>1</sup>, Kai Bester<sup>3</sup>, Hans Brix<sup>1</sup>

<sup>1</sup>Department of Bioscience, Aarhus University, Ole Worms Allé 1, Building 1135, 8000 Aarhus C., Denmark

<sup>2</sup>College of Life Science, South China Normal University, Guangzhou 510631, PR China

<sup>3</sup>Department of Environmental Science, Aarhus University, Frederiksborgvej 399, 4000 Roskilde, Denmark

\* Corresponding author:

Tel.: Tel.: +45 87158462

E-mail address: [pedro.carvalho@envs.au.dk](mailto:pedro.carvalho@envs.au.dk)

ORCID: 0000-0002-7131-9102

---

### Table of Contents:

**Table S1.** Compounds studied description and chemical properties

**M&M1.** Solid-phase extraction procedures

**Table S2.** Instrument (HPLC-DAD) analytical figures of merit (LOD, LOQ, linearity range and R<sup>2</sup>)

**Figure S1.** Typical chromatograms for sediment extracts

**Figure S2.** Typical chromatograms for plant extracts

**Table S3.** Comparison of the present method characteristics for sediment analysis with relevant multi-residue methods published

**Table S4.** Comparison of the present method characteristics for plant analysis with other multi-residue methods published

**Figure S3.** Imazalil concentration in sediment samples

**Figure S4.** Ibuprofen concentration in plant tissue (leaves and roots)

---

<sup>†</sup> Current address: Department of Environmental Science, Aarhus University, Frederiksborgvej 399, 4000 Roskilde, Denmark

<sup>‡</sup> Current address: School of environmental Science and Engineering, Southern University of Science and Technology, Shenzhen 518055, PR China

<sup>§</sup> Current address: School of Animal, Rural and Environmental Sciences, Nottingham Trent University, Nottinghamshire NG25 0QF, UK

**Table S1.** Compounds studied description and chemical properties

| Systematic (common) name<br>Family / Application                                                                                                 | Common abbreviation | CASno.      | Structural formula                                                                    | MW<br>(g mol <sup>-1</sup> ) | Log <i>K<sub>ow</sub></i> |
|--------------------------------------------------------------------------------------------------------------------------------------------------|---------------------|-------------|---------------------------------------------------------------------------------------|------------------------------|---------------------------|
| <b>Pesticides</b>                                                                                                                                |                     |             |                                                                                       |                              |                           |
| 1,2-Benzisothiazol-3(2H)-one<br>(Benzisothiazolinone)<br>Isothiazolinones / Microbiocide and fungicide                                           | BIT                 | 2634-33-5   | 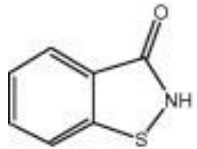   | 151                          | 0.64 <sup>a</sup>         |
| Methyl-benzimidazol-2-yl carbamate<br>(Carbendazim)<br>Carbamates / Fungicide                                                                    | CD                  | 10605-21-7  |    | 191                          | 1.55 <sup>a</sup>         |
| 3-(3,4-dichloro-phenyl)-1,1-dimethylurea<br>(Diuron)<br>Phenylureas / herbicide                                                                  | DR                  | 330-54-1    |    | 233                          | 2.67 <sup>a</sup>         |
| ( <i>RS</i> )-1-[2-(Allyloxy)-2-(2,4-dichlorophenyl)ethyl]-1 <i>H</i> -imidazole<br>(Imazalil)<br>Imidazoles / Fungicide and veterinary medicine | IMZ                 | 35554-44-0  |   | 297                          | 4.10 <sup>a</sup>         |
| 2-(4-Chloro-2-methylphenoxy)propionic acid<br>(Mecoprop)<br>Isothiazolinones / Herbicide                                                         | MCP                 | 7085-19-0   |  | 214                          | 2.94 <sup>a</sup>         |
| 1-(4-Chlorophenyl)-4,4-dimethyl-3-(1 <i>H</i> -1,2,4-triazol-1-ylmethyl)-3-pentanol<br>(Tebuconazole)<br>Triazoles / Fungicide                   | TBU                 | 107534-96-3 |  | 307                          | 3.89 <sup>a</sup>         |

|                                                                                                                                                   |     |            |                                                                                       |     |                    |
|---------------------------------------------------------------------------------------------------------------------------------------------------|-----|------------|---------------------------------------------------------------------------------------|-----|--------------------|
| N <sup>2</sup> -tert-butyl-N <sup>4</sup> -ethyl-6-(methylthio)-1,3,5-triazine-2,4-diamine (Terbutryn)                                            | TB  | 886-50-0   | 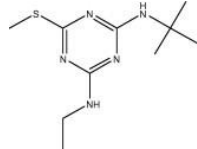   | 241 | 3.77 <sup>a</sup>  |
| Triazines / Algaecide and herbicide                                                                                                               |     |            |                                                                                       |     |                    |
| <b>Antibacterial</b> (analysed together with the pesticides)                                                                                      |     |            |                                                                                       |     |                    |
| 5-Chloro-2-(2,4-dichlorophenoxy)phenol (Triclosan)                                                                                                | TCS | 3380-34-5  |    | 289 | 4.66 <sup>a</sup>  |
| Phenoxyphenols / Antimicrobial and fungicide                                                                                                      |     |            |                                                                                       |     |                    |
| <b>Pharmaceuticals</b>                                                                                                                            |     |            |                                                                                       |     |                    |
| 5 <i>H</i> -Dibenz[ <i>b,f</i> ]azepine-5-carboxamide (Carbamazepine)                                                                             | CBZ | 298-46-4   |    | 236 | 2.25 <sup>a</sup>  |
| - / Anticonvulsant                                                                                                                                |     |            |                                                                                       |     |                    |
| 2-[(2,6-Dichlorophenyl)amino]benzeneacetic acid sodium salt (Diclofenac)                                                                          | DCF | 15307-79-6 |    | 296 | 4.02 <sup>a</sup>  |
| - / Nonsteroidal anti-inflammatory drug (NSAID)                                                                                                   |     |            |                                                                                       |     |                    |
| ( <i>RS</i> )-2-(4-(2-methylpropyl)phenyl)propanoic acid (Ibuprofen)                                                                              | IBP | 15687-27-1 |  | 206 | 3.79 <sup>a</sup>  |
| - / Nonsteroidal anti-inflammatory drug (NSAID)                                                                                                   |     |            |                                                                                       |     |                    |
| 1- <i>N</i> ,3- <i>N</i> -bis(2,3-dihydroxypropyl)-5-[ <i>N</i> -(2,3-dihydroxypropyl)acetamido]-2,4,6-triiodobenzene-1,3-dicarboxamide (Iohexol) | IHE | 66108-95-0 |  | 821 | -4.16 <sup>b</sup> |
| - / Radiocontrast agents                                                                                                                          |     |            |                                                                                       |     |                    |

|                                                                                                                                                   |     |            |                                                                                      |     |                    |
|---------------------------------------------------------------------------------------------------------------------------------------------------|-----|------------|--------------------------------------------------------------------------------------|-----|--------------------|
| 1- <i>N</i> ,3- <i>N</i> -bis(2,3-dihydroxypropyl)-5-(2-hydroxy- <i>N</i> -methylacetamido)-2,4,6-triiodobenzene-1,3-dicarboxamide (Iomeprol)     | IME | 78649-41-9 | 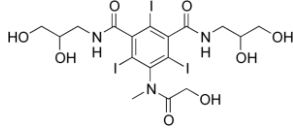  | 777 | -3.08 <sup>b</sup> |
| - / Radiocontrast agents                                                                                                                          |     |            |                                                                                      |     |                    |
| 1- <i>N</i> ,3- <i>N</i> -bis(1,3-dihydroxypropan-2-yl)-5-[(2 <i>S</i> )-2-hydroxypropanamido]-2,4,6-triiodobenzene-1,3-dicarboxamide (Iopamidol) | IPA | 60166-93-0 |   | 777 | -2.54 <sup>b</sup> |
| - / Radiocontrast agents                                                                                                                          |     |            |                                                                                      |     |                    |
| 1- <i>N</i> ,3- <i>N</i> -bis(2,3-dihydroxypropyl)-2,4,6-triiodo-5-(2-methoxyacetamido)-1- <i>N</i> -methylbenzene-1,3-dicarboxamide (Iopromide)  | IPR | 73334-07-3 |   | 791 | -2.95 <sup>b</sup> |
| - / Radiocontrast agents                                                                                                                          |     |            |                                                                                      |     |                    |
| (2 <i>S</i> )-2-(6-methoxynaphthalen-2-yl)propanoic acid (Naproxen)                                                                               | NPX | 22204-53-1 |   | 230 | 3.10 <sup>a</sup>  |
| - / Nonsteroidal anti-inflammatory drug (NSAID)                                                                                                   |     |            |                                                                                      |     |                    |
| (±)-1-Isopropylamino-3-(1-naphthoxy)-2-propanol hydrochloride (Propranolol)                                                                       | PPL | 318-98-9   |  | 259 | 2.60 <sup>a</sup>  |
| - / Beta blocker                                                                                                                                  |     |            |                                                                                      |     |                    |

<sup>a</sup> Values from EPISuites

<sup>b</sup> Values from ACD/Labs

### **M&M1.** Solid-phase extraction (SPE) procedures

Strata-X cartridges were conditioned with 5 mL of MeOH followed by 5 mL of MilliQ water and a 100 mL sample (water:methanol 95:5, v/v) was loaded. After washing with 5 mL of water:methanol (95:5, v/v), the cartridges were dried for 30 min prior to being eluted with 5 mL of methanol:formic acid (90:10). Florisil cartridges were conditioned with 5 mL of *n*-hexane followed by loading of 5 mL methanolic samples. After washing with 5 mL of *n*-hexane:acetone (99:1, v/v), cartridges were dried for 5 min prior to being eluted with 5 mL of *n*-hexane:acetone (90:10, v/v).

**Table S2.** Instrument (HPLC-DAD) analytical figures of merit (LOD, LOQ, linearity range and R<sup>2</sup>)\*

| Pesticides           | $\lambda$<br>(nm) | Retention time<br>(min) | Linear range<br>(mg L <sup>-1</sup> ) | R <sup>2</sup><br>(n=8) | ILOD<br>(mg L <sup>-1</sup> ) | ILOQ<br>(mg L <sup>-1</sup> ) |
|----------------------|-------------------|-------------------------|---------------------------------------|-------------------------|-------------------------------|-------------------------------|
| Carbendazim          | 240               | 9.6                     | 0.2 -10                               | 0.9968                  | 0.05                          | 0.2                           |
| Benzoisothiazolinone | 240               | 10.7                    | 0.1 -10                               | 0.9964                  | 0.01                          | 0.05                          |
| Imazalil             | 220               | 11.5                    | 0.5 -10                               | 0.9974                  | 0.2                           | 0.5                           |
| Terbutryn            | 240               | 12.2                    | 0.1 -10                               | 0.9957                  | 0.01                          | 0.05                          |
| Diuron               | 240               | 12.5                    | 0.1 -10                               | 0.9951                  | 0.01                          | 0.05                          |
| Mecoprop             | 220               | 13.0                    | 0.3 -10                               | 0.9965                  | 0.1                           | 0.3                           |
| Tebuconazole         | 220               | 14.3                    | 0.4 -10                               | 0.9959                  | 0.1                           | 0.4                           |
| Triclosan            | 240               | 15.3                    | 0.2 -10                               | 0.9967                  | 0.08                          | 0.2                           |
| Pharmaceuticals      | $\lambda$<br>(nm) | Retention time<br>(min) | Linear range<br>(mg L <sup>-1</sup> ) | R <sup>2</sup><br>(n=8) | LOD<br>(mg L <sup>-1</sup> )  | LOQ<br>(mg L <sup>-1</sup> )  |
| Iopamidol            | 240               | 8.4                     | 0.2 -10                               | 0.9951                  | 0.05                          | 0.2                           |
| Iohexol              | 240               | 8.9                     | 0.3 -10                               | 0.9952                  | 0.1                           | 0.3                           |
| Iomeprol             | 240               | 9.0                     | 0.3 -10                               | 0.9947                  | 0.1                           | 0.3                           |
| Iopromide            | 240               | 9.4                     | 0.2 -10                               | 0.9943                  | 0.05                          | 0.2                           |
| Propranolol          | 240               | 11.2                    | 0.2 -10                               | 0.9947                  | 0.03                          | 0.2                           |
| Carbamazepine        | 240               | 12.4                    | 0.1 -10                               | 0.9945                  | 0.05                          | 0.1                           |
| Naproxen             | 240               | 13.5                    | 0.1 -10                               | 0.9942                  | 0.05                          | 0.1                           |
| Ibuprofen            | 220               | 13.8                    | 0.3 -10                               | 0.9951                  | 0.1                           | 0.3                           |
| Diclofenac           | 240               | 14.7                    | 0.2 -10                               | 0.9964                  | 0.05                          | 0.2                           |

\* determined before any sample extraction and clean-up step using analytical standards and methanolic solutions

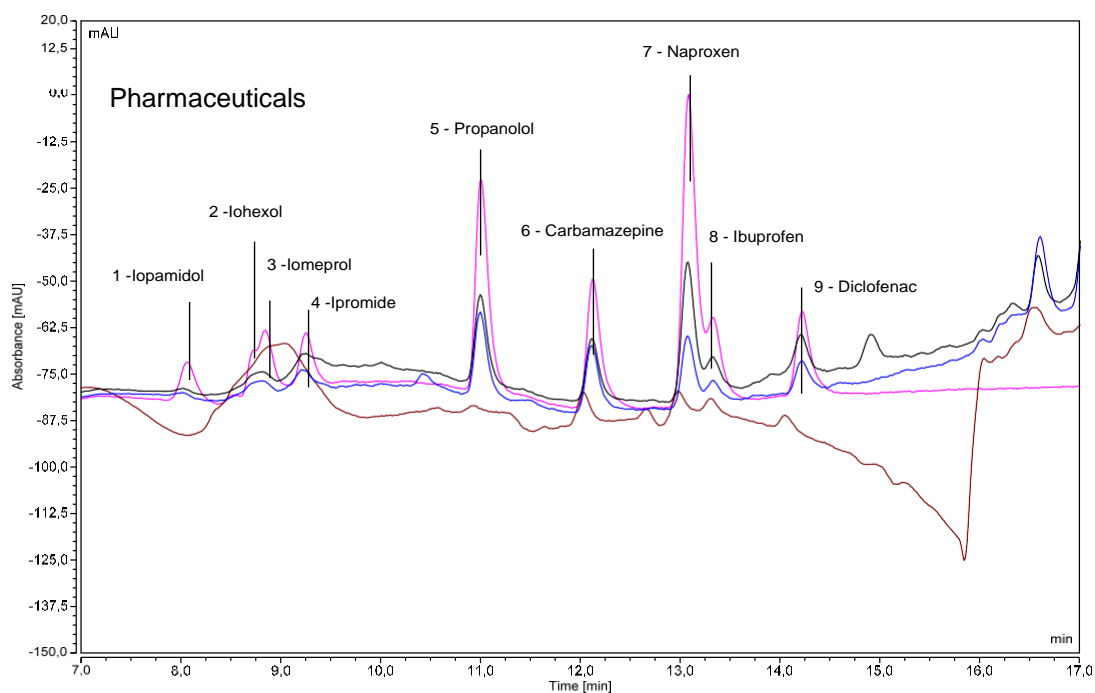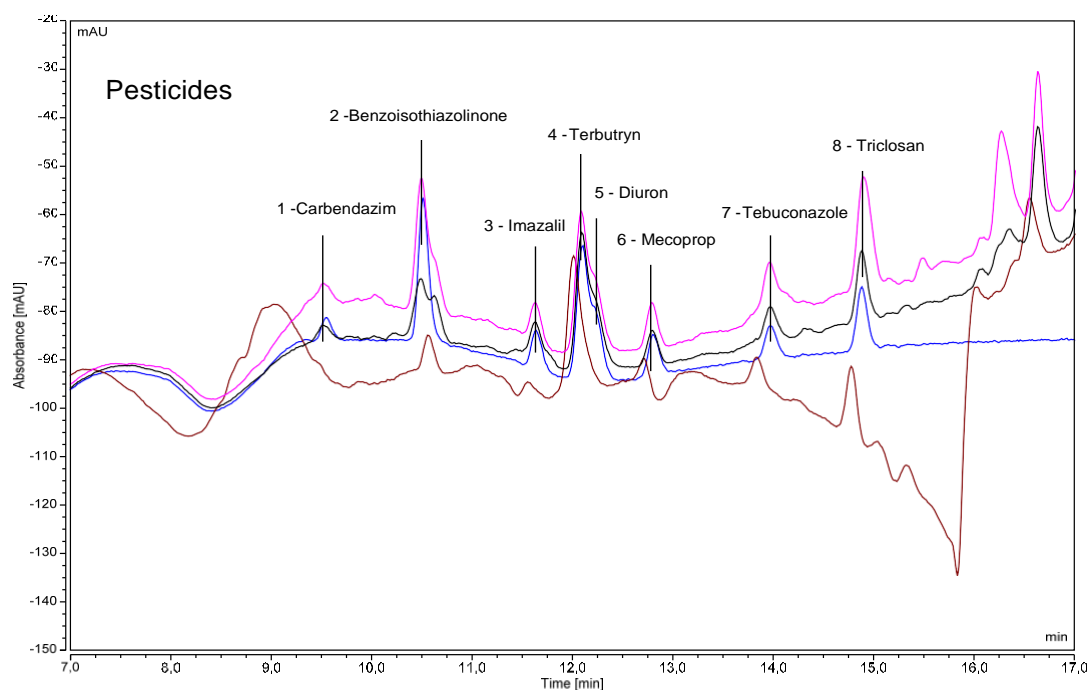

**Figure S1.** Typical chromatogram (DAD  $\lambda = 220$  nm; background blank corrected) obtained for standard solution (■) and hexane (■); methanol:formic acid 96:4 v:v (■); methanol:acetone 95:5 v:v (■) extracts of spiked sediment ( $0.5 \mu\text{g}$  micropollutant  $\text{g}_{\text{dry sediment}}^{-1}$  spiking level, theoretically  $10 \text{ ng}$  of micropollutant injected) after 30 min of ultrasonication

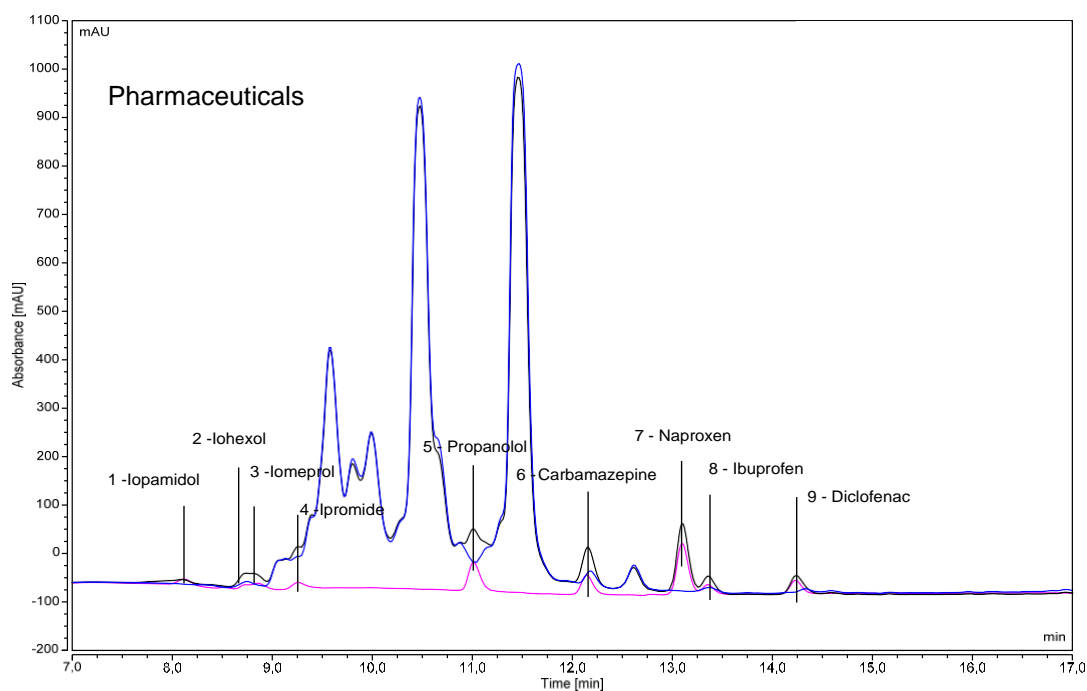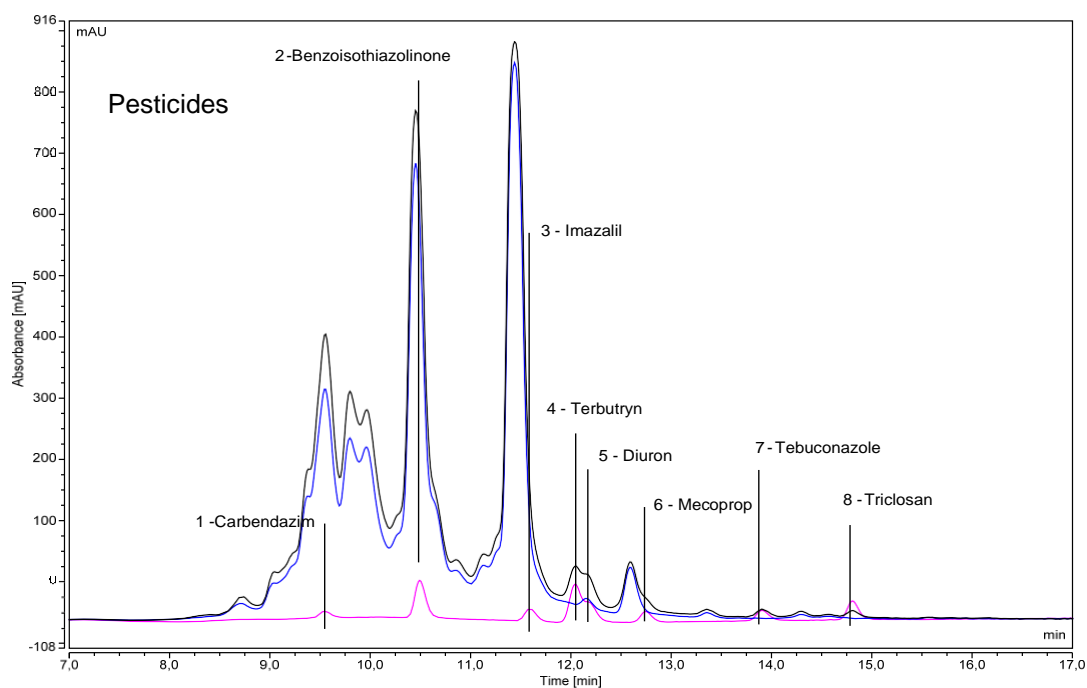

**Figure S2.** Typical chromatogram (DAD  $\lambda = 220$  nm; background blank corrected) obtained for standard solution (■) and methanol: acetone 95:5 v:v extracts of spiked plant material ( $5 \mu\text{g}$  micropollutant  $\text{g}_{\text{dry sediment}}^{-1}$  spiking level; theoretically  $10 \text{ ng}$  of micropollutant injected) (■) and non-spiked plant material (■) after 30 min of ultrasonication, no clean-up



**Table S3.** Comparison of the present method characteristics for sediment analysis with relevant multi-residue methods published

| Pesticides      |                     |                           |                           |            |              |
|-----------------|---------------------|---------------------------|---------------------------|------------|--------------|
| Reference       | Methodology         | LOD (ng g <sup>-1</sup> ) | LOQ (ng g <sup>-1</sup> ) | RSD (%)    | Recovery (%) |
| This work       | USE-HPLC-DAD        | 5 - 100                   | 25 - 250                  | 4 - 30     | 53 - 101     |
| [13]            | PLE-LL-LC-HRMS/MS   | 0.01 - 4                  | 0.03 - 14                 | 1 - 30     | 57 - 139     |
| [15]            | USE-SPE-LC-MS/MS    | 0.7 - 1.2                 | -                         | 9 - 12     | 68 - 102     |
| [29]            | *LC-MS/MS           | 3                         | 10                        | 26 - 45    | 40 - 60      |
| [34]            | QuEChERS-LC-MS/MS   | 0.1 - 2                   | 1 - 6                     | 8          | 46 - 102     |
| [37]            | MAE-SPME-GC-MS      | 0.01 - 0.1                | 0.02 - 0.45               | 7 - 17     | 86 - 112     |
| [39]            | SLE-LC-MS/MS        | -                         | 0.1 - 49                  | 3 - 28     | 40 - 125     |
| [40]            | PLE-SPE-LC-MS/MS    | 0.02 - 17                 | -                         | 2 - 17     | 67 - 118     |
| Pharmaceuticals |                     |                           |                           |            |              |
| Reference       | Methodology         | LOD (ng g <sup>-1</sup> ) | LOQ (ng g <sup>-1</sup> ) | RSD (%)    | Recovery (%) |
| This work       | USE-HPLC-DAD        | 15 - 50                   | 50 - 150                  | 6 - 12     | 50 - 98      |
| [11]            | MAE-GC-MS           | 30 - 80                   | -                         | < 11       | 25 - 81      |
| [11]            | MAE-HPLC-DAD        | < 167                     | -                         | < 11       | > 70         |
| [13]            | PLE-LL-LC-HRMS/MS   | 0.01 - 4                  | 0.03 - 14                 | 1 - 30     | 57 - 139     |
| [15]            | USE-SPE-LC-MS/MS    | 0.9 - 9.4                 | -                         | 6 - 14     | 41 - 92      |
| [21]            | USE-SPE-LC-MS/MS    | 0.08 - 4.2                | -                         | -          | 41 - 151     |
| [30]            | MAE-SPE-GC-MS       | 0.3 - 5.7                 | 0.9 - 17.1                | 0.7 - 14.7 | > 50         |
| [35]            | MAE-LC-MS/MS        | 0.3                       | 1.0                       | 1 - 8      | 98 - 103     |
| [36]            | USE-SPE-LC-MS/MS    | -                         | 0.6 - 5.6                 | -          | < 10 - 343   |
| [38]            | USE-SPE-HPLC-DAD/FL | -                         | 1 - 187                   | -          | < 15 - 103   |

USE – Ultrasonic solvent extraction, HPLC – High performance liquid chromatography, DAD diode array detector, PLE - pressurized liquid extraction, LL – liquid-liquid partitioning clean-up, LC-liquid chromatography, HRMS/MS high resolution Orbitrap mass spectrometry, SPE – solid-phase extraction, MS/MS – tandem mass spectrometry, \*extraction not stated, QuEChERS - Quick Easy Cheap Effective Rugged Safe method, DMAE - dynamic microwave-assisted extraction, CFME - continuous-flow microextraction, GC – gas chromatography, MS – mass spectrometry, MAE – microwave assisted extraction, SPME – solid-phase microextraction, SLE – solid-liquid extraction, FL - fluorescence detectors,

**Table S4.** Comparison of the present method characteristics for plant analysis with other multi-residue methods published

| Pesticides      |                         |                           |                           |         |              |
|-----------------|-------------------------|---------------------------|---------------------------|---------|--------------|
| Reference       | Methodology             | LOD (ng g <sup>-1</sup> ) | LOQ (ng g <sup>-1</sup> ) | RSD (%) | Recovery (%) |
| This work       | USE-HPLC-DAD            | 50 - 1000                 | 250 - 2500                | 4 - 30  | 53 - 101     |
| [29]            | *LC-MS/MS               | 3                         | 10                        | 21 - 43 | 45 - 50      |
| [41]            | DMAE-CFME-GC-MS         | 0.6 - 1.6                 | 2 - 5                     | 9       | 81 - 107     |
| [42]            | dispersive-SPE-LC-MS/MS |                           | 10                        | 3 - 16  | 72 - 104     |
| [43]            | QuEChERS-LC-MS/MS       |                           | 10 - 50                   | < 20    | 80 - 136     |
| [44]            | SLE-SO-SPE-GC-MS/MS     |                           | 10                        | < 20    | 70 - 120     |
| Pharmaceuticals |                         |                           |                           |         |              |
| Reference       | Methodology             | LOD (ng g <sup>-1</sup> ) | LOQ (ng g <sup>-1</sup> ) | RSD (%) | Recovery (%) |
| This work       | USE-HPLC-DAD            | 150 - 500                 | 500 - 1500                | 6 - 12  | 50 - 98      |
| [14]            | USE-SPE-LC-MS/MS        | 0.5 - 1.5                 | 2 - 4                     | -       | 73 - 92      |
| [14]            | BE-SPE-GC-MS            | 10 - 20                   | 20 - 75                   | -       | 15 - 98      |
| [14]            | PLE-SPE-LC-MS           | 2 - 23                    | -                         | -       | 46 - 176     |
| [14]            | BE-SPE-LC-MS/MS         | 25                        | -                         | -       | 40 - 120     |
| [14]            | PLE-SPE-GC-MS           | 7 - 58                    | -                         | -       | 46 - 94      |
| [45]            | PLE-LC-MS/MS            | 2 - 12                    | -                         | < 20    | 70 - 134     |
| [45]            | QuEChERS-LC-MS/MS       | 0.7 - 8                   | -                         | < 20    | 70 - 119     |

USE – Ultrasonic solvent extraction, HPLC – High performance liquid chromatography, DAD diode array detector, dispersive-SPE - dispersive solid phase extraction, LC- liquid chromatography, MS/MS – tandem mass spectrometry, \*extraction not stated, SLE – solid-liquid extraction, SO – salting out, SPE – solid-phase extraction, GC – gas chromatography, QuEChERS - Quick Easy Cheap Effective Rugged Safe method, BE – buffer extraction, MS – mass spectrometry, PLE - pressurized liquid extraction

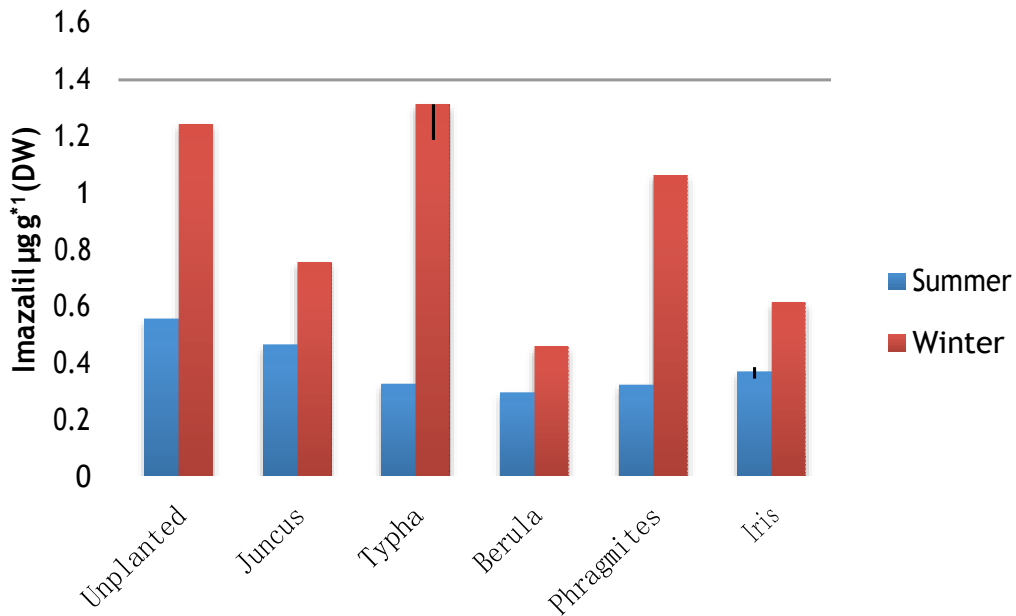

**Figure S3.** Imazalil concentration in substrate samples (sediment) from 6 different constructed wetland bed mesocosms (unplanted and planted with different plants) continuously run over 9 months under various hydraulic loading rates and imazalil concentration of both 10 and 100 µg L<sup>-1</sup> in the influent

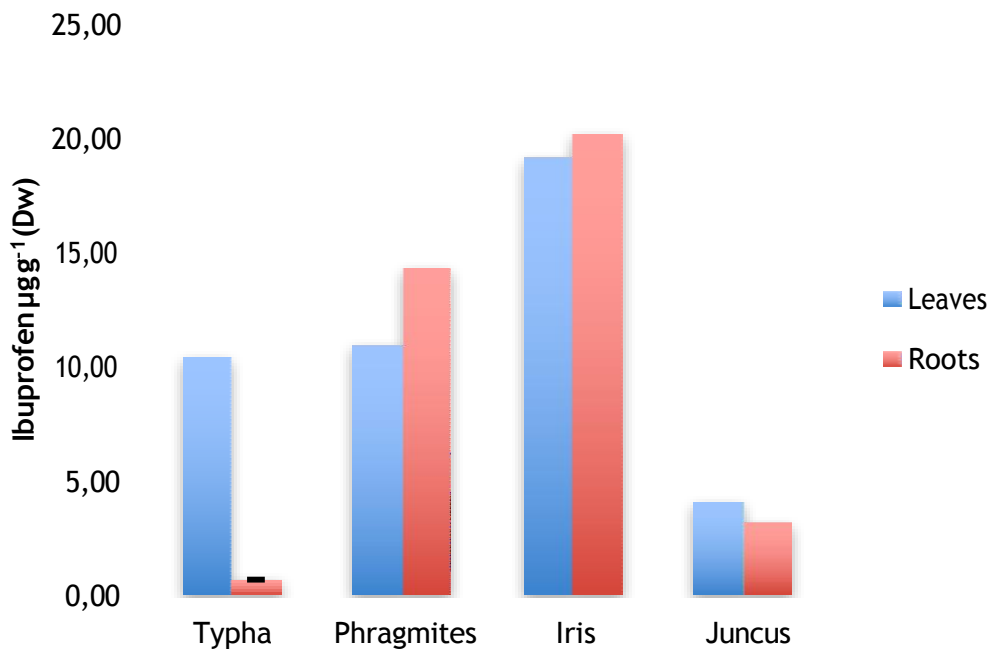

**Figure S4.** Ibuprofen concentration in plant tissue (leaves and roots) in different plant species after exposure for 24 days in spiked hydroponic media (water concentration of 10 mg L<sup>-1</sup>)

## References

- [11] L. Sanchez-Prado, C. Garcia-Jares and M. Llompart, *Journal of Chromatography A*, 2010, 1217, 2390-2414.
- [13] A. C. Chiaia-Hernandez, M. Krauss and J. Hollender, *Environmental Science & Technology*, 2013, 47, 976-986.
- [14] V. Matamoros, D. Calderon-Preciado, C. Dominguez and J. M. Bayona, *Analytica Chimica Acta*, 2012, 722, 8-20.
- [15] H. Darwano, S. V. Duy and S. Sauve, *Archives of Environmental Contamination and Toxicology*, 2014, 66, 582-593.
- [21] B. Albero, C. Sánchez-Brunete, A. I. García-Valcárcel, R. A. Pérez and J. L. Tadeo, *TrAC Trends in Analytical Chemistry*, 2015, 71, 110-118.
- [29] E. Maillard and G. Imfeld, *Environmental Science & Technology*, 2014, 48, 8603-8611.
- [30] J. Kumirska, N. Migowska, M. Caban, P. Lukaszewicz and P. Stepnowski, *Science of the Total Environment*, 2015, 508, 498-505
- [34] M. Kvíčalová, P. Doubravová, R. Jobánek, M. Jokešová, V. Očenášková, H. Süssenbeková and A. Svobodová, *Bulletin of Environmental Contamination and Toxicology*, 2012, 89, 21-26
- [35] M. Wagil, J. Maszkowska, A. Bialk-Bielinska, P. Stepnowski and J. Kumirska, *Chemosphere*, 2015, 119 Suppl, S35-41
- [36] L.-J. Zhou, G.-G. Ying, S. Liu, J.-L. Zhao, F. Chen, R.-Q. Zhang, F.-Q. Peng and Q.-Q. Zhang, *Journal of Chromatography A*, 2012, 1244, 123-138
- [37] P. N. Carvalho, P. N. Rodrigues, F. Alves, R. Evangelista, M. C. Basto and M. T. Vasconcelos, *Talanta*, 2008, 76, 1124-1129
- [38] J. Martín, J. L. Santos, I. Aparicio and E. Alonso, *Journal of Separation Science*, 2010, 33, 1760-1766
- [39] A. Lazartigues, C. Fratta, R. Baudot, L. Wiest, C. Feidt, M. Thomas and C. Cren-Olivé, *Talanta*, 2011, 85, 1500-1507
- [40] M. Köck-Schulmeyer, M. Olmos, M. López de Alda and D. Barceló, *Journal of Chromatography A*, 2013, 1305, 176-187
- [41] L. Wu, M. Hu, Z. Li, Y. Song, C. Yu, H. Zhang, A. Yu, Q. Ma and Z. Wang, *Food Chemistry*, 2016, 192, 596-602
- [42] S. Walorczyk, D. Drożdżyński and R. Kierzek, *Talanta*, 2015, 132, 197-204
- [43] A. Abad-Fuentes, E. Ceballos-Alcantarilla, J. V. Mercader, C. Agulló, A. Abad-Somovilla and F. A. Esteve-Turrillas, *Analytical and Bioanalytical Chemistry*, 2015, 407, 4207-4211
- [44] S. Saito-Shida, S. Nemoto and R. Teshima, *Journal of Environmental Science and Health, Part B*, 2015, 50, 760-776
- [45] Y. H. Chuang, Y. Zhang, W. Zhang, S. A. Boyd and H. Li, *Journal of Chromatography A*, 2015, 1404, 1-9
